# Supplementary material for: Reduction in Inflammatory Gene Expression in Skeletal Muscle from Roux-en-Y Gastric Bypass Patients Randomized to Omentectomy
Source: PubMed Central journal article supplement (PMC3241684; doi:10.1371/journal.pone.0028577), 2011-12-16
Supplement: pone.0028577.s004.pdf [file pone.0028577.s004.pdf]

**Supplemental Table 2.** Gene expression values changed greater than 4 fold.

| Affymetrix ST 1.0 Array ID | 0-No     | 6-No     | 12-No    | 0-Yes    | 6-Yes    | 12-Yes   | Selected for<br>TLDA validation |
|----------------------------|----------|----------|----------|----------|----------|----------|---------------------------------|
| 8177277_RBMY2EP            | 4.80685  | 3.122865 | 3.440672 | 2.462251 | 3.371255 | 3.441513 |                                 |
| 7933192_HNRPA3P1           | 8.510757 | 7.32415  | 7.104011 | 6.302529 | 6.594611 | 7.076342 |                                 |
| 7924821_gm127              | 4.064403 | 2.170289 | 1.881405 | 2.047589 | 2.066068 | 2.186831 |                                 |
| 8078918_SNORA62            | 7.51971  | 7.281384 | 8.218526 | 6.808687 | 6.836918 | 5.998769 |                                 |
| 7962827_SNORA2A            | 6.199946 | 5.857545 | 7.095224 | 5.029156 | 5.425472 | 5.045056 |                                 |
| 8086330_AXUD1              | 7.539693 | 6.40331  | 6.276914 | 8.580238 | 6.514306 | 6.498477 |                                 |
| 7960865_SLC2A3             | 8.558565 | 7.155959 | 7.138912 | 9.925293 | 7.315548 | 7.409976 | *                               |
| 8062461_LBP                | 6.286387 | 5.212593 | 5.207602 | 7.377002 | 5.208519 | 5.241776 | *                               |
| 8131803_IL6                | 6.572118 | 4.298875 | 3.994312 | 9.20948  | 4.191224 | 4.131359 | *                               |
| 8065353_THBD               | 8.380108 | 7.252122 | 7.300261 | 10.15004 | 7.344264 | 7.534771 |                                 |
| 8018864_SOCS3              | 7.390345 | 5.788718 | 6.00757  | 9.394246 | 5.991076 | 6.031529 | *                               |
| 8028652_ZFP36              | 8.770538 | 7.499611 | 7.605748 | 9.742706 | 7.381183 | 7.527718 | *                               |
| 7922229_SELE               | 5.4181   | 4.115772 | 4.101108 | 6.422738 | 3.961088 | 3.99727  | *                               |
| 8148317_MYC                | 8.694508 | 6.689812 | 6.684913 | 9.890925 | 6.802518 | 6.759993 | *                               |
| 7909610_ATF3               | 6.150059 | 5.011442 | 4.857962 | 7.030092 | 4.797831 | 5.057142 | *                               |
| 8006433_CCL2               | 8.090573 | 5.753876 | 5.997232 | 9.892403 | 6.032413 | 6.673797 | *                               |
| 8055952_NR4A2              | 6.371752 | 5.120424 | 5.204181 | 7.01383  | 4.901578 | 5.416981 |                                 |
| 8024485_GADD45B            | 8.762878 | 7.112932 | 7.4543   | 9.710638 | 6.899641 | 7.231446 |                                 |
| 8025828_LDLR               | 7.551499 | 6.668352 | 6.744151 | 8.694988 | 6.803265 | 6.47048  |                                 |
| 8069676_ADAMTS1            | 7.485305 | 6.225791 | 6.256622 | 9.018669 | 6.244499 | 5.600326 |                                 |
| 7954090_EMP1               | 8.039775 | 6.908692 | 7.437132 | 9.176338 | 7.00295  | 7.030322 |                                 |
| 7982597_THBS1              | 7.204099 | 5.091434 | 5.93718  | 8.742728 | 5.727201 | 5.614112 | *                               |
| 7995806_MT1A               | 8.134527 | 7.166582 | 7.689427 | 9.871501 | 7.3113   | 7.394695 |                                 |
| 7995787_MT1M               | 5.978323 | 4.848859 | 5.551747 | 7.50469  | 5.013453 | 5.263241 |                                 |
| 8119088_CDKN1A             | 7.242183 | 6.294436 | 6.662832 | 8.00008  | 5.973511 | 6.232096 |                                 |
| 8135069_SERPINE1           | 6.657064 | 5.812365 | 5.85717  | 8.362505 | 5.686234 | 5.795318 |                                 |
| 7934916_CH25H              | 5.362375 | 4.79632  | 4.684476 | 6.996476 | 4.429471 | 4.570127 | *                               |
| 8162276_NFIL3              | 6.329495 | 5.64381  | 5.782287 | 7.884641 | 5.246184 | 5.414359 | *                               |
| 8095680_IL8                | 5.897976 | 5.341805 | 5.117891 | 7.110512 | 5.090364 | 5.459977 | *                               |
| 8122265_TNFAIP3            | 5.849085 | 5.521491 | 5.580415 | 7.643896 | 5.566999 | 5.484686 | *                               |
| 7921821_ADAMTS4            | 6.092053 | 5.468916 | 5.466109 | 8.154138 | 5.328287 | 5.662237 |                                 |
| 8025601_ICAM1              | 6.756937 | 6.393631 | 6.274061 | 8.733776 | 6.475596 | 6.775353 |                                 |
| 8156848_NR4A3              | 8.099947 | 5.349873 | 5.370732 | 9.016953 | 5.362062 | 5.331358 | *                               |
| 8029693_FOSB               | 8.151516 | 5.977442 | 6.025079 | 8.817471 | 6.031658 | 6.151453 | *                               |
| 8100994_CXCL2              | 6.671572 | 4.678912 | 4.818462 | 7.235061 | 4.617105 | 4.988464 | *                               |
| 7955589_NR4A1              | 9.449126 | 7.551409 | 7.632787 | 9.822363 | 7.454026 | 7.776206 |                                 |
| 7902687_CYR61              | 8.880627 | 6.09381  | 6.273723 | 8.932739 | 5.985374 | 6.418232 | *                               |
| 8070665_SNF1LK             | 8.290503 | 6.896962 | 6.344887 | 8.853451 | 6.469741 | 6.887445 |                                 |
| 7908650_DKFZp434B1231      | 7.949509 | 5.697185 | 5.393947 | 8.434153 | 5.327543 | 6.099721 | *(IGFN1)                        |
| 8026047_JUNB               | 9.293178 | 7.271778 | 6.906909 | 10.38707 | 6.827059 | 6.95755  | *                               |
| 7975779_FOS                | 10.57765 | 7.430259 | 6.48291  | 11.66186 | 6.538942 | 6.597856 | *                               |
| 8108370_EGR1               | 10.80861 | 8.262308 | 7.754484 | 11.49982 | 7.02523  | 7.29497  | *                               |
| 8163002_KLF4               | 7.328327 | 6.011024 | 6.559502 | 8.030248 | 6.353899 | 5.98921  | *                               |
| 7934979_ANKRD1             | 10.04154 | 6.880675 | 8.563455 | 11.09228 | 8.515297 | 7.59908  | *                               |
| 8084206_B3GNT5             | 5.200742 | 5.2751   | 4.990438 | 7.003935 | 5.581347 | 4.751616 |                                 |

**Supplemental Table 2.** Gene expression values changed greater than 4 fold.

| Affymetrix ST 1.0 Array ID | 0-No     | 6-No     | 12-No    | 0-Yes    | 6-Yes    | 12-Yes   | Selected for TLDA validation |
|----------------------------|----------|----------|----------|----------|----------|----------|------------------------------|
| 8042788_ACTG2              | 6.832311 | 5.304186 | 4.648211 | 5.931125 | 4.828603 | 5.087222 |                              |
| 7921690_ITLN1              | 5.735618 | 3.333037 | 3.498801 | 4.553938 | 3.268131 | 3.538781 | *                            |
| 8175531_CDR1               | 9.056747 | 6.546371 | 5.693292 | 8.43884  | 6.643586 | 7.088392 | *                            |
| 8106573_THBS4              | 10.34515 | 8.109584 | 8.275132 | 10.1714  | 8.606795 | 8.910921 |                              |
| 8175311_CXorf48            | 5.806885 | 3.713603 | 4.654748 | 5.100195 | 4.146898 | 4.521109 |                              |
| 8086538_LOC644714          | 5.599468 | 4.351937 | 4.099707 | 5.02061  | 3.552668 | 2.884873 |                              |
| 7929816_SCD                | 6.044382 | 5.579355 | 6.807779 | 7.409997 | 4.718183 | 5.818217 |                              |
| 7920873_SNORA42            | 9.00288  | 9.065637 | 9.69422  | 9.829914 | 7.691227 | 8.2898   |                              |
| 8084710_ADIPOQ             | 6.652029 | 5.050607 | 7.386399 | 7.43758  | 5.178266 | 5.982008 | *                            |
| 8172204_MAOB               | 7.000094 | 9.08445  | 8.611274 | 8.012955 | 8.795534 | 8.489779 |                              |
| 8085972_GADL1              | 4.765821 | 7.026444 | 6.326088 | 5.806799 | 6.522945 | 6.299081 |                              |
| 7981990_PWCR1              | 7.560956 | 10.09714 | 9.457023 | 8.297421 | 10.0244  | 10.00622 |                              |
| 7964246_SNORD59B           | 4.904507 | 7.402366 | 6.834342 | 5.578261 | 7.184622 | 7.083579 |                              |
| 8048014_RPE                | 4.137071 | 6.044708 | 6.313691 | 4.883709 | 6.615355 | 5.941701 |                              |
| 8100076_YIPF7              | 4.604855 | 6.148519 | 6.079689 | 4.579904 | 6.650743 | 6.063931 |                              |
| 8152297_ANGPT1             | 4.704666 | 6.313934 | 5.670928 | 5.109509 | 7.121245 | 5.92354  |                              |
| 8176276_ATRX               | 4.807721 | 5.916878 | 5.88197  | 3.963777 | 6.58672  | 5.746941 |                              |
| 7903171_RWDD3              | 5.353331 | 5.977451 | 6.043171 | 4.516362 | 6.554813 | 5.697886 |                              |
| 7971653_DLEU2              | 5.351854 | 6.803867 | 6.876899 | 4.535005 | 6.757162 | 6.079217 |                              |
| 8036813_ZNF780B            | 6.145348 | 6.995065 | 6.385077 | 5.224241 | 7.400749 | 6.154045 |                              |
| 7982056_SNORD115-25        | 5.203169 | 6.588611 | 7.973662 | 6.177649 | 6.490047 | 6.190371 |                              |
| 7899480_SNORA73A           | 7.67704  | 9.235293 | 10.16249 | 8.76265  | 8.890179 | 9.008179 |                              |
| 7922410_SNORD44            | 3.65333  | 4.832745 | 5.761621 | 4.458853 | 5.326138 | 4.546572 |                              |
| 7942476_PAAF1              | 4.523174 | 6.396067 | 6.538217 | 5.659863 | 6.12923  | 5.687025 | *                            |
| 7964927_TSPAN8             | 5.448067 | 7.252806 | 7.658467 | 5.376956 | 7.15762  | 7.176741 |                              |
| 7955858_HOXC10             | 6.880888 | 8.936766 | 8.958694 | 6.700663 | 8.572292 | 8.859509 | *                            |
| 8090872_KY                 | 6.278491 | 8.344924 | 8.159504 | 6.40702  | 7.698461 | 8.085257 |                              |
| 8086344_CX3CR1             | 4.645247 | 6.1487   | 6.772928 | 5.155847 | 5.955734 | 6.268933 | *                            |
| 8150877_SNORD54            | 6.451601 | 8.223743 | 8.517153 | 6.360693 | 7.253968 | 7.656013 |                              |
| 7982094_SNORD115-44        | 4.851773 | 7.28913  | 7.609309 | 4.9387   | 6.004126 | 6.570806 |                              |
| 7982090_SNORD115-6         | 6.987512 | 8.683914 | 9.264561 | 7.298702 | 8.348167 | 8.238748 |                              |
| 7982018_SNORD115-6         | 6.842948 | 8.608117 | 9.14786  | 7.255433 | 8.288251 | 8.112522 |                              |
| 7948902_SNORD29            | 5.424897 | 7.207188 | 7.771396 | 5.733396 | 6.846253 | 6.581488 |                              |
| 7982084_SNORD115-12        | 8.160503 | 9.866423 | 10.19704 | 8.370279 | 9.339622 | 9.109344 |                              |
| 7982064_SNORD115-43        | 6.873795 | 8.621606 | 9.326948 | 7.069919 | 8.375408 | 7.939776 |                              |
| 7982028_SNORD115-43        | 6.873795 | 8.621606 | 9.326948 | 7.069919 | 8.375408 | 7.939776 |                              |
| 7982078_SNORD115-11        | 6.873795 | 8.621606 | 9.326948 | 7.069919 | 8.375408 | 7.939776 |                              |
| 7982092_SNORD115-9         | 6.873795 | 8.621606 | 9.326948 | 7.069919 | 8.375408 | 7.939776 |                              |
| 7982058_SNORD115-26        | 6.885887 | 8.678682 | 9.350237 | 7.080369 | 8.397387 | 7.980684 |                              |
| 7982050_SNORD115-12        | 6.590799 | 8.211433 | 9.127142 | 6.533457 | 7.990268 | 7.631471 |                              |
| 7982024_SNORD115-12        | 6.737932 | 8.331493 | 9.284879 | 7.020904 | 8.361834 | 7.845249 |                              |
| 7982016_SNORD115-5         | 6.737932 | 8.331493 | 9.284879 | 7.020904 | 8.361834 | 7.845249 |                              |
| 7982030_SNORD115-5         | 6.737932 | 8.331493 | 9.284879 | 7.020904 | 8.361834 | 7.845249 |                              |
| 7982052_SNORD115-23        | 4.80685  | 6.55149  | 7.845061 | 4.94208  | 6.645257 | 5.704524 |                              |
| 7982020_SNORD115-7         | 3.424789 | 5.185725 | 6.429635 | 3.542834 | 5.350282 | 4.105939 |                              |

**Supplemental Table 2.** Gene expression values changed greater than 4 fold.

| Affymetrix ST 1.0 Array ID | 0-No     | 6-No     | 12-No    | 0-Yes    | 6-Yes    | 12-Yes   | Selected for TLDA validation |
|----------------------------|----------|----------|----------|----------|----------|----------|------------------------------|
| 7982032_SNORD115-16        | 6.227508 | 8.221359 | 8.913842 | 6.973832 | 7.520998 | 7.457349 |                              |
| 7982008_SNORD115-13        | 6.227508 | 8.221359 | 8.913842 | 6.973832 | 7.520998 | 7.457349 |                              |
| 7982038_SNORD115-1         | 6.227508 | 8.221359 | 8.913842 | 6.973832 | 7.520998 | 7.457349 |                              |
| 7945801_SNORA54            | 6.836258 | 7.388804 | 8.671158 | 6.417747 | 7.055333 | 6.548425 |                              |
| 7982046_SNORD115-20        | 4.859962 | 6.130544 | 7.420487 | 4.39804  | 5.780389 | 5.337734 |                              |
| 7982070_SNORD115-32        | 5.876432 | 5.709281 | 7.798697 | 6.026777 | 6.501827 | 6.058663 |                              |
| 7931832_AKR1C2             | 7.142639 | 7.82648  | 9.344638 | 8.681243 | 8.485197 | 8.169376 |                              |
| 8012949_FBXW10             | 3.211884 | 5.521269 | 5.27685  | 4.130258 | 3.989397 | 5.691766 | *                            |
| 7948910_SNORD25            | 2.377039 | 4.473607 | 2.849568 | 3.189246 | 3.781446 | 4.432712 |                              |
| 7925525_CEP170             | 5.10986  | 6.63482  | 4.537164 | 5.67205  | 6.527928 | 5.029363 |                              |
| 7957023_LYZ                | 6.47368  | 5.155236 | 6.849636 | 6.121959 | 7.168526 | 7.163974 |                              |
| 7920244_S100A8             | 7.059299 | 5.333441 | 6.849293 | 6.809156 | 7.459221 | 7.209466 |                              |
| 8048227_IL8RB              | 4.734203 | 3.785798 | 5.326231 | 4.017436 | 5.988665 | 5.119635 |                              |
