# Supplementary material for: Reduction in Inflammatory Gene Expression in Skeletal Muscle from Roux-en-Y Gastric Bypass Patients Randomized to Omentectomy
Source: PubMed Central journal article supplement (PMC3241684; doi:10.1371/journal.pone.0028577), 2011-12-16
Supplement: pone.0028577.s005.pdf [file pone.0028577.s005.pdf]

**Supplemental Table 3.** TLDA probes utilized in this study.

| Gene Symbol | Assay ID      | RefSeq ID      | Amplicon length |
|-------------|---------------|----------------|-----------------|
| 18S         | Hs99999901_s1 | X03205.1       | 187             |
| FOS         | Hs99999140_m1 | NM_005252.3    | 77              |
| EGR1        | Hs00152928_m1 | NM_001964.2    | 72              |
| JUNB        | Hs00357891_s1 | NM_002229.2    | 89              |
| MYC         | Hs99999003_m1 | NM_002467.4    | 65              |
| ITLN1       | Hs00914745_m1 | NM_017625.2    | 71              |
| HOXC10      | Hs00213579_m1 | NM_017409.3    | 60              |
| ANKRD1      | Hs00173317_m1 | NM_014391.2    | 63              |
| FOSB        | Hs00171851_m1 | NM_001114171.1 | 106             |
| CDR1        | Hs00601346_s1 | NM_004065.2    | 86              |
| CCL2        | Hs00234140_m1 | NM_002982.3    | 101             |
| IL6         | Hs00985641_m1 | NM_000600.3    | 89              |
| NR4A3       | Hs00175072_m1 | D78579.1       | 60              |
| CYR61       | Hs00155479_m1 | NM_001554.4    | 88              |
| ADIPOQ      | Hs00605917_m1 | NM_004797.2    | 71              |
| THBS1       | Hs00962908_m1 | NM_003246.2    | 59              |
| SLC2A3      | Hs00359840_m1 | NM_006931.2    | 112             |
| CH25H       | Hs02379634_s1 | NM_003956.3    | 155             |
| CXCL2       | Hs00236966_m1 | NM_002089.3    | 68              |
| SOCS3       | Hs02330328_s1 | NM_003955.3    | 89              |
| IL8         | Hs99999034_m1 | NM_000584.2    | 81              |
| LBP         | Hs00188074_m1 | NM_004139.2    | 113             |
| SELE        | Hs00174057_m1 | NM_000450.2    | 83              |
| NFIL3       | Hs00356605_g1 | NM_005384.2    | 80              |
| TNFAIP3     | Hs00234713_m1 | NM_006290.2    | 63              |
| ATF3        | Hs00910173_m1 | NM_001030287.2 | 78              |
| ZFP36       | Hs00185658_m1 | NM_003407.2    | 105             |
| KLF4        | Hs01034973_g1 | NM_004235.4    | 74              |
| IGFN1       | Hs00297580_m1 | AL137493.1     | 81              |
| PAAF1       | Hs00228523_m1 | NM_025155.1    | 80              |
| CX3CR1      | Hs00365842_m1 | NM_001337.3    | 84              |
