# Supplementary material for: Reduction in Inflammatory Gene Expression in Skeletal Muscle from Roux-en-Y Gastric Bypass Patients Randomized to Omentectomy
Source: PubMed Central journal article supplement (PMC3241684; doi:10.1371/journal.pone.0028577), 2011-12-16
Supplement: pone.0028577.s006.pdf [file pone.0028577.s006.pdf]

**Supplemental Table 4.** Array-revealed Average Gene Expression Values for Members of Various Molecular Pathways

| Number of Genes in Pathway | Average (No Omentectomy; 6 vs. 0 Mo) | Average (Yes Omentectomy; 6 vs. 0 Mo) | Average (No Omentectomy; 12 vs. 0 Mo) | Average (Yes Omentectomy; 12 vs. 0 Mo) | Pathway Number | Pathway                                                    |
|----------------------------|--------------------------------------|---------------------------------------|---------------------------------------|----------------------------------------|----------------|------------------------------------------------------------|
| 137                        | 9.14E-01                             | 6.97E-01                              | 7.59E-01                              | 5.90E-01                               | 86             | Metabolic pathways                                         |
| 43                         | 9.20E-01                             | 1.07E+00                              | 8.42E-01                              | 8.58E-01                               | 105            | Cytokine-cytokine receptor interaction                     |
| 42                         | 1.05E+00                             | 1.04E+00                              | 8.84E-01                              | 8.17E-01                               | 102            | MAPK signaling pathway                                     |
| 38                         | 8.89E-01                             | 1.02E+00                              | 7.71E-01                              | 7.92E-01                               | 106            | Chemokine signaling pathway                                |
| 36                         | 8.99E-01                             | 7.61E-01                              | 8.78E-01                              | 4.48E-01                               | 93             | Spliceosome                                                |
| 30                         | 1.01E+00                             | 1.04E+00                              | 8.46E-01                              | 6.78E-01                               | 109            | Cell cycle                                                 |
| 29                         | 9.83E-01                             | 8.91E-01                              | 7.71E-01                              | 5.96E-01                               | 131            | Focal adhesion                                             |
| 29                         | 1.12E+00                             | 7.21E-01                              | 8.07E-01                              | 5.76E-01                               | 118            | Phagosome                                                  |
| 27                         | 6.54E-01                             | 8.19E-01                              | 9.37E-01                              | 8.10E-01                               | 88             | Ribosome                                                   |
| 27                         | 8.18E-01                             | 6.45E-01                              | 6.88E-01                              | 4.45E-01                               | 115            | Protein processing in endoplasmic reticulum                |
| 26                         | 1.02E+00                             | 9.04E-01                              | 8.51E-01                              | 5.26E-01                               | 112            | Ubiquitin mediated proteolysis                             |
| 26                         | 8.36E-01                             | 5.49E-01                              | 8.07E-01                              | 4.90E-01                               | 157            | Olfactory transduction                                     |
| 25                         | 8.93E-01                             | 1.20E+00                              | 7.78E-01                              | 9.39E-01                               | 144            | Jak-STAT signaling pathway                                 |
| 24                         | 9.62E-01                             | 9.08E-01                              | 6.10E-01                              | 4.67E-01                               | 117            | Endocytosis                                                |
| 24                         | 1.09E+00                             | 8.91E-01                              | 9.23E-01                              | 6.10E-01                               | 124            | Wnt signaling pathway                                      |
| 24                         | 8.55E-01                             | 8.13E-01                              | 6.58E-01                              | 5.04E-01                               | 160            | Regulation of actin cytoskeleton                           |
| 24                         | 9.86E-01                             | 7.11E-01                              | 7.76E-01                              | 5.69E-01                               | 104            | Calcium signaling pathway                                  |
| 22                         | 8.33E-01                             | 6.23E-01                              | 5.48E-01                              | 5.41E-01                               | 190            | Toxoplasmosis                                              |
| 21                         | 9.58E-01                             | 1.18E+00                              | 8.80E-01                              | 9.91E-01                               | 140            | Toll-like receptor signaling pathway                       |
| 20                         | 1.01E+00                             | 1.07E+00                              | 6.96E-01                              | 7.26E-01                               | 161            | Insulin signaling pathway                                  |
| 20                         | 8.59E-01                             | 1.00E+00                              | 7.24E-01                              | 8.32E-01                               | 191            | Amoebiasis                                                 |
| 20                         | 6.18E-01                             | 7.68E-01                              | 8.63E-01                              | 7.26E-01                               | 178            | Parkinson's disease                                        |
| 20                         | 8.36E-01                             | 7.22E-01                              | 9.30E-01                              | 6.61E-01                               | 177            | Alzheimer's disease                                        |
| 20                         | 8.02E-01                             | 6.40E-01                              | 9.49E-01                              | 5.70E-01                               | 16             | Oxidative phosphorylation                                  |
| 19                         | 1.24E+00                             | 1.15E+00                              | 9.73E-01                              | 7.86E-01                               | 128            | TGF-beta signaling pathway                                 |
| 19                         | 7.88E-01                             | 7.85E-01                              | 8.57E-01                              | 7.47E-01                               | 180            | Huntington's disease                                       |
| 19                         | 9.64E-01                             | 7.75E-01                              | 9.79E-01                              | 5.14E-01                               | 110            | Oocyte meiosis                                             |
| 19                         | 8.83E-01                             | 7.69E-01                              | 7.36E-01                              | 5.49E-01                               | 17             | Purine metabolism                                          |
| 19                         | 8.45E-01                             | 7.31E-01                              | 6.83E-01                              | 4.37E-01                               | 135            | Tight junction                                             |
| 19                         | 9.66E-01                             | 7.18E-01                              | 7.45E-01                              | 5.82E-01                               | 175            | Pancreatic secretion                                       |
| 19                         | 1.13E+00                             | 7.17E-01                              | 8.89E-01                              | 4.41E-01                               | 123            | Vascular smooth muscle contraction                         |
| 18                         | 7.13E-01                             | 8.21E-01                              | 4.81E-01                              | 5.85E-01                               | 151            | Leukocyte transendothelial migration                       |
| 18                         | 8.53E-01                             | 7.33E-01                              | 6.91E-01                              | 5.18E-01                               | 155            | Neurotrophin signaling pathway                             |
| 18                         | 9.09E-01                             | 5.87E-01                              | 8.15E-01                              | 4.06E-01                               | 108            | Neuroactive ligand-receptor interaction                    |
| 17                         | 1.15E+00                             | 1.64E+00                              | 1.08E+00                              | 1.37E+00                               | 188            | Chagas disease                                             |
| 17                         | 9.31E-01                             | 8.29E-01                              | 7.33E-01                              | 5.54E-01                               | 184            | Epithelial cell signaling in Helicobacter pylori infection |
| 17                         | 9.02E-01                             | 7.05E-01                              | 7.09E-01                              | 5.47E-01                               | 107            | Phosphatidylinositol signaling system                      |
| 17                         | 7.78E-01                             | 5.49E-01                              | 7.84E-01                              | 4.91E-01                               | 209            | Systemic lupus erythematosus                               |
| 16                         | 1.01E+00                             | 9.96E-01                              | 8.22E-01                              | 5.38E-01                               | 89             | RNA degradation                                            |
| 16                         | 1.05E+00                             | 9.14E-01                              | 7.64E-01                              | 5.83E-01                               | 129            | Axon guidance                                              |
| 16                         | 1.10E+00                             | 8.44E-01                              | 7.67E-01                              | 6.57E-01                               | 173            | Salivary secretion                                         |
| 16                         | 8.73E-01                             | 7.83E-01                              | 7.85E-01                              | 6.71E-01                               | 133            | Cell adhesion molecules (CAMs)                             |
| 16                         | 1.00E+00                             | 7.17E-01                              | 8.60E-01                              | 5.44E-01                               | 162            | GnRH signaling pathway                                     |
| 16                         | 9.75E-01                             | 6.75E-01                              | 8.64E-01                              | 4.24E-01                               | 163            | Progesterone-mediated oocyte maturation                    |
| 15                         | 1.10E+00                             | 1.70E+00                              | 1.09E+00                              | 1.69E+00                               | 189            | Malaria                                                    |
| 15                         | 1.17E+00                             | 1.58E+00                              | 1.06E+00                              | 1.32E+00                               | 141            | NOD-like receptor signaling pathway                        |
| 15                         | 1.15E+00                             | 1.14E+00                              | 9.53E-01                              | 9.78E-01                               | 213            | Hypertrophic cardiomyopathy (HCM)                          |
| 15                         | 1.01E+00                             | 1.07E+00                              | 8.10E-01                              | 8.19E-01                               | 103            | ErbB signaling pathway                                     |
| 15                         | 9.86E-01                             | 9.38E-01                              | 9.20E-01                              | 7.29E-01                               | 147            | T cell receptor signaling pathway                          |
| 15                         | 8.68E-01                             | 8.62E-01                              | 7.59E-01                              | 7.30E-01                               | 96             | PPAR signaling pathway                                     |
| 15                         | 8.38E-01                             | 6.76E-01                              | 8.95E-01                              | 5.02E-01                               | 119            | Peroxisome                                                 |
| 15                         | 9.53E-01                             | 6.55E-01                              | 8.99E-01                              | 6.00E-01                               | 81             | Aminoacyl-tRNA biosynthesis                                |
| 15                         | 8.74E-01                             | 6.46E-01                              | 5.78E-01                              | 4.95E-01                               | 150            | Fc gamma R-mediated phagocytosis                           |
| 14                         | 9.94E-01                             | 1.38E+00                              | 7.73E-01                              | 1.08E+00                               | 111            | p53 signaling pathway                                      |
| 14                         | 9.74E-01                             | 8.72E-01                              | 8.50E-01                              | 7.32E-01                               | 174            | Gastric acid secretion                                     |
| 14                         | 9.14E-01                             | 8.56E-01                              | 6.31E-01                              | 5.65E-01                               | 214            | Arrhythmogenic right ventricular cardiomyopathy (ARVC)     |
| 14                         | 1.02E+00                             | 8.14E-01                              | 8.49E-01                              | 6.64E-01                               | 215            | Dilated cardiomyopathy                                     |
| 14                         | 8.53E-01                             | 7.73E-01                              | 7.78E-01                              | 6.14E-01                               | 146            | Natural killer cell mediated cytotoxicity                  |
| 14                         | 9.47E-01                             | 7.47E-01                              | 7.98E-01                              | 7.29E-01                               | 116            | Lysosome                                                   |

**Supplemental Table 4.** Array-revealed Average Gene Expression Values for Members of Various Molecular Pathways

| Number of Genes in Pathway | Average (No Omentectomy; 6 vs. 0 Mo) | Average (Yes Omentectomy; 6 vs. 0 Mo) | Average (No Omentectomy; 12 vs. 0 Mo) | Average (Yes Omentectomy; 12 vs. 0 Mo) | Pathway Number | Pathway                                      |
|----------------------------|--------------------------------------|---------------------------------------|---------------------------------------|----------------------------------------|----------------|----------------------------------------------|
| 14                         | 9.78E-01                             | 7.26E-01                              | 8.47E-01                              | 4.73E-01                               | 164            | Melanogenesis                                |
| 13                         | 1.19E+00                             | 1.09E+00                              | 9.69E-01                              | 7.07E-01                               | 132            | ECM-receptor interaction                     |
| 13                         | 1.01E+00                             | 8.89E-01                              | 8.71E-01                              | 8.39E-01                               | 187            | Leishmaniasis                                |
| 13                         | 7.48E-01                             | 8.12E-01                              | 7.23E-01                              | 5.75E-01                               | 194            | Renal cell carcinoma                         |
| 12                         | 7.92E-01                             | 1.02E+00                              | 8.38E-01                              | 9.49E-01                               | 122            | Cardiac muscle contraction                   |
| 12                         | 1.04E+00                             | 9.51E-01                              | 9.34E-01                              | 7.27E-01                               | 148            | B cell receptor signaling pathway            |
| 12                         | 9.02E-01                             | 8.57E-01                              | 7.57E-01                              | 6.59E-01                               | 19             | Pyrimidine metabolism                        |
| 12                         | 7.83E-01                             | 8.52E-01                              | 7.44E-01                              | 5.33E-01                               | 98             | Nucleotide excision repair                   |
| 12                         | 9.57E-01                             | 8.44E-01                              | 8.04E-01                              | 6.22E-01                               | 197            | Glioma                                       |
| 12                         | 9.54E-01                             | 7.59E-01                              | 7.55E-01                              | 4.29E-01                               | 198            | Prostate cancer                              |
| 12                         | 9.74E-01                             | 7.44E-01                              | 7.10E-01                              | 5.29E-01                               | 52             | Inositol phosphate metabolism                |
| 12                         | 8.41E-01                             | 6.62E-01                              | 9.50E-01                              | 4.67E-01                               | 216            | Viral myocarditis                            |
| 12                         | 8.87E-01                             | 6.18E-01                              | 5.93E-01                              | 4.68E-01                               | 149            | Fc epsilon RI signaling pathway              |
| 12                         | 1.12E+00                             | 6.15E-01                              | 8.82E-01                              | 5.69E-01                               | 54             | Glycerophospholipid metabolism               |
| 12                         | 1.12E+00                             | 5.93E-01                              | 7.24E-01                              | 3.99E-01                               | 156            | Long-term depression                         |
| 12                         | 9.55E-01                             | 5.63E-01                              | 8.00E-01                              | 4.35E-01                               | 183            | Vibrio cholerae infection                    |
| 12                         | 1.11E+00                             | 4.04E-01                              | 1.02E+00                              | 3.71E-01                               | 138            | Antigen processing and presentation          |
| 11                         | 9.20E-01                             | 1.16E+00                              | 6.36E-01                              | 8.49E-01                               | 166            | Type II diabetes mellitus                    |
| 11                         | 8.74E-01                             | 1.09E+00                              | 8.93E-01                              | 1.11E+00                               | 145            | Hematopoietic cell lineage                   |
| 11                         | 9.68E-01                             | 1.05E+00                              | 6.99E-01                              | 6.81E-01                               | 186            | Shigellosis                                  |
| 11                         | 8.84E-01                             | 9.20E-01                              | 6.49E-01                              | 6.44E-01                               | 204            | Acute myeloid leukemia                       |
| 11                         | 1.07E+00                             | 8.55E-01                              | 8.49E-01                              | 4.38E-01                               | 136            | Gap junction                                 |
| 11                         | 7.55E-01                             | 7.89E-01                              | 6.00E-01                              | 2.83E-01                               | 134            | Adherens junction                            |
| 11                         | 8.81E-01                             | 7.44E-01                              | 6.45E-01                              | 3.83E-01                               | 195            | Pancreatic cancer                            |
| 11                         | 7.94E-01                             | 6.93E-01                              | 6.42E-01                              | 6.32E-01                               | 130            | VEGF signaling pathway                       |
| 11                         | 7.34E-01                             | 5.14E-01                              | 9.64E-01                              | 5.10E-01                               | 94             | Proteasome                                   |
| 10                         | 1.14E+00                             | 1.13E+00                              | 8.39E-01                              | 9.08E-01                               | 165            | Adipocytokine signaling pathway              |
| 10                         | 8.47E-01                             | 1.13E+00                              | 7.29E-01                              | 1.04E+00                               | 137            | Complement and coagulation cascades          |
| 10                         | 9.65E-01                             | 1.05E+00                              | 7.84E-01                              | 7.78E-01                               | 203            | Chronic myeloid leukemia                     |
| 10                         | 5.95E-01                             | 8.38E-01                              | 4.96E-01                              | 7.29E-01                               | 121            | Apoptosis                                    |
| 10                         | 9.15E-01                             | 8.04E-01                              | 7.19E-01                              | 4.59E-01                               | 142            | RIG-I-like receptor signaling pathway        |
| 9                          | 1.19E+00                             | 1.46E+00                              | 1.15E+00                              | 1.18E+00                               | 193            | Colorectal cancer                            |
| 9                          | 1.11E+00                             | 6.94E-01                              | 9.44E-01                              | 4.68E-01                               | 154            | Long-term potentiation                       |
| 9                          | 8.31E-01                             | 8.45E-01                              | 6.20E-01                              | 5.28E-01                               | 201            | Melanoma                                     |
| 9                          | 8.25E-01                             | 7.49E-01                              | 6.29E-01                              | 5.75E-01                               | 169            | Aldosterone-regulated sodium reabsorption    |
| 9                          | 6.99E-01                             | 8.96E-01                              | 7.35E-01                              | 8.47E-01                               | 205            | Small cell lung cancer                       |
| 8                          | 1.06E+00                             | 8.96E-01                              | 7.96E-01                              | 7.39E-01                               | 83             | Drug metabolism - cytochrome P450            |
| 8                          | 9.91E-01                             | 8.99E-01                              | 7.68E-01                              | 4.61E-01                               | 87             | ABC transporters                             |
| 8                          | 8.93E-01                             | 8.57E-01                              | 6.23E-01                              | 4.76E-01                               | 185            | Pathogenic Escherichia coli infection        |
| 8                          | 8.76E-01                             | 6.89E-01                              | 6.82E-01                              | 4.63E-01                               | 120            | mTOR signaling pathway                       |
| 8                          | 8.53E-01                             | 7.08E-01                              | 6.34E-01                              | 4.06E-01                               | 206            | Non-small cell lung cancer                   |
| 8                          | 8.50E-01                             | 8.40E-01                              | 6.78E-01                              | 6.88E-01                               | 39             | Glutathione metabolism                       |
| 8                          | 8.45E-01                             | 6.90E-01                              | 8.27E-01                              | 5.21E-01                               | 91             | Basal transcription factors                  |
| 8                          | 8.35E-01                             | 1.19E+00                              | 5.06E-01                              | 7.76E-01                               | 182            | Bacterial invasion of epithelial cells       |
| 8                          | 8.13E-01                             | 4.51E-01                              | 7.39E-01                              | 4.88E-01                               | 56             | Arachidonic acid metabolism                  |
| 8                          | 7.41E-01                             | 5.90E-01                              | 6.69E-01                              | 4.16E-01                               | 41             | N-Glycan biosynthesis                        |
| 8                          | 6.61E-01                             | 1.10E+00                              | 4.22E-01                              | 8.29E-01                               | 176            | Carbohydrate digestion and absorption        |
| 7                          | 1.22E+00                             | 6.50E-01                              | 9.09E-01                              | 7.44E-01                               | 27             | Arginine and proline metabolism              |
| 7                          | 1.06E+00                             | 1.04E+00                              | 7.12E-01                              | 5.85E-01                               | 5              | Fructose and mannose metabolism              |
| 7                          | 9.99E-01                             | 1.27E+00                              | 9.49E-01                              | 1.14E+00                               | 143            | Cytosolic DNA-sensing pathway                |
| 7                          | 9.74E-01                             | 1.14E+00                              | 6.11E-01                              | 8.45E-01                               | 71             | Nicotinate and nicotinamide metabolism       |
| 7                          | 8.87E-01                             | 1.18E+00                              | 6.56E-01                              | 7.80E-01                               | 196            | Endometrial cancer                           |
| 7                          | 8.87E-01                             | 7.79E-01                              | 8.61E-01                              | 8.13E-01                               | 82             | Metabolism of xenobiotics by cytochrome P450 |
| 7                          | 8.62E-01                             | 8.86E-01                              | 4.18E-01                              | 6.29E-01                               | 40             | Starch and sucrose metabolism                |
| 7                          | 8.21E-01                             | 5.72E-01                              | 5.44E-01                              | 5.45E-01                               | 200            | Basal cell carcinoma                         |
| 7                          | 7.71E-01                             | 9.63E-01                              | 7.45E-01                              | 5.94E-01                               | 113            | SNARE interactions in vesicular transport    |
| 7                          | 7.27E-01                             | 1.00E+00                              | 5.18E-01                              | 5.35E-01                               | 45             | Amino sugar and nucleotide sugar metabolism  |
| 6                          | 1.28E+00                             | 1.90E+00                              | 9.61E-01                              | 1.73E+00                               | 202            | Bladder cancer                               |
| 6                          | 1.21E+00                             | 6.18E-01                              | 1.19E+00                              | 4.30E-01                               | 2              | Citrate cycle (TCA cycle)                    |

**Supplemental Table 4.** Array-revealed Average Gene Expression Values for Members of Various Molecular Pathways

| Number of Genes in Pathway | Average (No Omentectomy; 6 vs. 0 Mo) | Average (Yes Omentectomy; 6 vs. 0 Mo) | Average (No Omentectomy; 12 vs. 0 Mo) | Average (Yes Omentectomy; 12 vs. 0 Mo) | Pathway Number | Pathway                                                    |
|----------------------------|--------------------------------------|---------------------------------------|---------------------------------------|----------------------------------------|----------------|------------------------------------------------------------|
| 6                          | 1.19E+00                             | 6.51E-01                              | 9.14E-01                              | 5.93E-01                               | 10             | Fatty acid metabolism                                      |
| 6                          | 1.12E+00                             | 7.92E-01                              | 8.20E-01                              | 4.05E-01                               | 170            | Vasopressin-regulated water reabsorption                   |
| 6                          | 1.04E+00                             | 7.63E-01                              | 9.80E-01                              | 7.59E-01                               | 29             | Tyrosine metabolism                                        |
| 6                          | 9.87E-01                             | 8.30E-01                              | 9.36E-01                              | 7.60E-01                               | 153            | Circadian rhythm - mammal                                  |
| 6                          | 9.04E-01                             | 7.86E-01                              | 5.98E-01                              | 6.78E-01                               | 127            | Hedgehog signaling pathway                                 |
| 6                          | 8.17E-01                             | 6.79E-01                              | 8.13E-01                              | 7.31E-01                               | 97             | Base excision repair                                       |
| 6                          | 7.38E-01                             | 9.61E-01                              | 7.44E-01                              | 6.01E-01                               | 95             | Protein export                                             |
| 6                          | 7.04E-01                             | 8.84E-01                              | 7.33E-01                              | 7.48E-01                               | 92             | DNA replication                                            |
| 5                          | 1.34E+00                             | 1.12E+00                              | 1.49E+00                              | 1.20E+00                               | 211            | Graft-versus-host disease                                  |
| 5                          | 1.14E+00                             | 6.73E-01                              | 9.46E-01                              | 5.31E-01                               | 23             | Valine, leucine and isoleucine degradation                 |
| 5                          | 1.14E+00                             | 1.10E+00                              | 9.20E-01                              | 8.76E-01                               | 199            | Thyroid cancer                                             |
| 5                          | 1.14E+00                             | 1.19E+00                              | 1.37E+00                              | 1.14E+00                               | 152            | Intestinal immune network for IgA production               |
| 5                          | 1.07E+00                             | 3.07E-01                              | 5.44E-01                              | 3.98E-01                               | 84             | Drug metabolism - other enzymes                            |
| 5                          | 1.04E+00                             | 4.30E-01                              | 8.74E-01                              | 4.87E-01                               | 15             | Steroid hormone biosynthesis                               |
| 5                          | 1.01E+00                             | 9.74E-01                              | 8.23E-01                              | 9.34E-01                               | 20             | Alanine, aspartate and glutamate metabolism                |
| 5                          | 9.92E-01                             | 6.71E-01                              | 8.52E-01                              | 5.92E-01                               | 55             | Ether lipid metabolism                                     |
| 5                          | 9.59E-01                             | 6.14E-01                              | 4.03E-01                              | 7.53E-01                               | 76             | Retinol metabolism                                         |
| 5                          | 8.82E-01                             | 4.16E-01                              | 6.08E-01                              | 4.41E-01                               | 172            | Collecting duct acid secretion                             |
| 5                          | 7.86E-01                             | 9.34E-01                              | 5.04E-01                              | 4.55E-01                               | 158            | Taste transduction                                         |
| 5                          | 5.25E-01                             | 9.15E-01                              | 3.50E-01                              | 9.09E-01                               | 53             | Glycosylphosphatidylinositol(GPI)-anchor biosynthesis      |
| 4                          | 1.39E+00                             | 2.88E+00                              | 1.61E+00                              | 2.70E+00                               | 181            | Prion diseases                                             |
| 4                          | 1.30E+00                             | 8.40E-01                              | 1.01E+00                              | 6.89E-01                               | 28             | Histidine metabolism                                       |
| 4                          | 9.89E-01                             | 6.39E-01                              | 9.83E-01                              | 4.63E-01                               | 65             | Propanoate metabolism                                      |
| 4                          | 8.80E-01                             | 4.29E-01                              | 5.91E-01                              | 8.34E-01                               | 77             | Porphyrin and chlorophyll metabolism                       |
| 4                          | 8.76E-01                             | 5.19E-01                              | 9.75E-01                              | 9.51E-01                               | 21             | Glycine, serine and threonine metabolism                   |
| 4                          | 8.53E-01                             | 5.64E-01                              | 7.66E-01                              | 6.23E-01                               | 58             | alpha-Linolenic acid metabolism                            |
| 4                          | 8.46E-01                             | 1.52E-01                              | 1.10E+00                              | 1.23E-01                               | 208            | Autoimmune thyroid disease                                 |
| 4                          | 8.37E-01                             | 2.93E-01                              | 7.30E-01                              | 2.18E-01                               | 212            | Primary immunodeficiency                                   |
| 4                          | 8.26E-01                             | 4.10E-01                              | 6.13E-01                              | 3.83E-01                               | 179            | Amyotrophic lateral sclerosis (ALS)                        |
| 4                          | 7.67E-01                             | 9.83E-01                              | 7.29E-01                              | 4.86E-01                               | 100            | Homologous recombination                                   |
| 4                          | 7.63E-01                             | 4.30E-01                              | 4.94E-01                              | 4.57E-01                               | 51             | Glycerolipid metabolism                                    |
| 4                          | 4.89E-01                             | 9.76E-01                              | 2.69E-01                              | 3.40E-01                               | 101            | Non-homologous end-joining                                 |
| 4                          | 4.63E-01                             | 9.41E-01                              | 4.84E-01                              | 9.43E-01                               | 60             | Glycosphingolipid biosynthesis - lacto and neolacto series |
| 3                          | 1.53E+00                             | 1.30E+00                              | 1.37E+00                              | 9.49E-01                               | 3              | Pentose phosphate pathway                                  |
| 3                          | 1.34E+00                             | 6.06E-01                              | 1.11E+00                              | 2.55E-01                               | 31             | Tryptophan metabolism                                      |
| 3                          | 1.22E+00                             | 6.99E-01                              | 1.06E+00                              | 8.23E-01                               | 30             | Phenylalanine metabolism                                   |
| 3                          | 1.19E+00                             | 8.49E-01                              | 7.50E-01                              | 4.44E-01                               | 114            | Regulation of autophagy                                    |
| 3                          | 1.09E+00                             | 9.88E-01                              | 8.43E-01                              | 9.23E-01                               | 4              | Pentose and glucuronate interconversions                   |
| 3                          | 1.08E+00                             | 5.84E-01                              | 9.26E-01                              | 6.48E-01                               | 22             | Cysteine and methionine metabolism                         |
| 3                          | 1.05E+00                             | 1.36E+00                              | 9.64E-01                              | 7.87E-01                               | 1              | Glycolysis / Gluconeogenesis                               |
| 3                          | 1.02E+00                             | 7.54E-01                              | 8.32E-01                              | 6.52E-01                               | 24             | Valine, leucine and isoleucine biosynthesis                |
| 3                          | 9.77E-01                             | 1.59E-01                              | 8.58E-01                              | 3.91E-01                               | 64             | Glyoxylate and dicarboxylate metabolism                    |
| 3                          | 9.25E-01                             | 5.18E-01                              | 5.56E-01                              | 3.04E-01                               | 43             | O-Glycan biosynthesis                                      |
| 3                          | 9.09E-01                             | 1.07E-01                              | 1.07E+00                              | 8.14E-02                               | 167            | Type I diabetes mellitus                                   |
| 3                          | 9.09E-01                             | 1.07E-01                              | 1.07E+00                              | 8.14E-02                               | 210            | Allograft rejection                                        |
| 3                          | 8.98E-01                             | 1.25E+00                              | 9.33E-01                              | 9.02E-01                               | 13             | Primary bile acid biosynthesis                             |
| 3                          | 8.88E-01                             | 5.77E-01                              | 6.73E-01                              | 6.62E-01                               | 57             | Linoleic acid metabolism                                   |
| 3                          | 8.76E-01                             | 5.46E-01                              | 8.13E-01                              | 5.58E-01                               | 33             | beta-Alanine metabolism                                    |
| 3                          | 8.40E-01                             | 1.07E+00                              | 9.49E-01                              | 1.16E+00                               | 79             | Nitrogen metabolism                                        |
| 3                          | 8.34E-01                             | 7.38E-01                              | 5.91E-01                              | 5.97E-01                               | 35             | Selenoamino acid metabolism                                |
| 3                          | 8.23E-01                             | 5.88E-01                              | 6.63E-01                              | 4.54E-01                               | 26             | Lysine degradation                                         |
| 3                          | 8.22E-01                             | 9.01E-01                              | 5.44E-01                              | 8.71E-01                               | 168            | Maturity onset diabetes of the young                       |
| 3                          | 7.88E-01                             | 4.18E-01                              | 8.17E-01                              | 5.51E-01                               | 67             | One carbon pool by folate                                  |
| 3                          | 7.84E-01                             | 1.04E+00                              | 5.48E-01                              | 1.01E+00                               | 171            | Proximal tubule bicarbonate reclamation                    |
| 3                          | 7.81E-01                             | 9.13E-01                              | 5.65E-01                              | 5.68E-01                               | 125            | Dorso-ventral axis formation                               |
| 3                          | 7.22E-01                             | 1.13E+00                              | 7.16E-01                              | 7.38E-01                               | 99             | Mismatch repair                                            |
| 3                          | 3.80E-01                             | 8.50E-01                              | 5.03E-01                              | 7.60E-01                               | 126            | Notch signaling pathway                                    |
| 2                          | 1.25E+00                             | 7.64E-01                              | 9.77E-01                              | 4.51E-01                               | 139            | Renin-angiotensin system                                   |
| 2                          | 1.15E+00                             | 8.84E-01                              | 8.31E-01                              | 7.90E-01                               | 90             | RNA polymerase                                             |

**Supplemental Table 4.** Array-revealed Average Gene Expression Values for Members of Various Molecular Pathways

| Number of Genes in Pathway | Average (No Omentectomy; 6 vs. 0 Mo) | Average (Yes Omentectomy; 6 vs. 0 Mo) | Average (No Omentectomy; 12 vs. 0 Mo) | Average (Yes Omentectomy; 12 vs. 0 Mo) | Pathway Number | Pathway                                              |
|----------------------------|--------------------------------------|---------------------------------------|---------------------------------------|----------------------------------------|----------------|------------------------------------------------------|
| 2                          | 1.03E+00                             | 1.01E+00                              | 8.05E-01                              | 7.59E-01                               | 75             | Folate biosynthesis                                  |
| 2                          | 9.57E-01                             | 3.77E-01                              | 1.07E+00                              | 3.60E-01                               | 207            | Asthma                                               |
| 2                          | 8.94E-01                             | 5.61E-01                              | 8.80E-01                              | 4.28E-01                               | 62             | Glycosphingolipid biosynthesis - ganglio series      |
| 2                          | 8.94E-01                             | 9.70E-01                              | 6.25E-01                              | 5.87E-01                               | 159            | Phototransduction                                    |
| 2                          | 7.05E-01                             | 9.65E-01                              | 5.62E-01                              | 3.13E-01                               | 49             | Glycosaminoglycan biosynthesis - keratan sulfate     |
| 2                          | 6.83E-01                             | 6.16E-01                              | 1.76E-01                              | 8.56E-01                               | 7              | Ascorbate and aldarate metabolism                    |
| 2                          | 6.06E-01                             | 1.61E+00                              | 9.03E-01                              | 1.05E+00                               | 85             | Biosynthesis of unsaturated fatty acids              |
| 1                          | 1.34E+00                             | 5.47E-01                              | 1.07E+00                              | 2.52E-01                               | 73             | Biotin metabolism                                    |
| 1                          | 1.19E+00                             | 3.19E-02                              | 5.74E-01                              | 1.69E-01                               | 36             | Cyanoamino acid metabolism                           |
| 1                          | 1.12E+00                             | 5.44E-01                              | 9.68E-01                              | 8.05E-01                               | 32             | Phenylalanine, tyrosine and tryptophan biosynthesis  |
| 1                          | 1.01E+00                             | 3.55E-01                              | 2.79E-01                              | 1.22E-02                               | 18             | Caffeine metabolism                                  |
| 1                          | 1.01E+00                             | 1.31E-01                              | 1.14E+00                              | 1.96E-01                               | 11             | Synthesis and degradation of ketone bodies           |
| 1                          | 1.01E+00                             | 1.31E-01                              | 1.14E+00                              | 1.96E-01                               | 66             | Butanoate metabolism                                 |
| 1                          | 1.01E+00                             | 1.31E-01                              | 1.14E+00                              | 1.96E-01                               | 78             | Terpenoid backbone biosynthesis                      |
| 1                          | 8.36E-01                             | 1.68E+00                              | 3.91E-01                              | 6.74E-01                               | 6              | Galactose metabolism                                 |
| 1                          | 8.36E-01                             | 1.68E+00                              | 3.91E-01                              | 6.74E-01                               | 46             | Butirosin and neomycin biosynthesis                  |
| 1                          | 6.63E-01                             | 8.69E-02                              | 1.00E+00                              | 2.89E-01                               | 61             | Glycosphingolipid biosynthesis - globo series        |
| 1                          | 4.60E-01                             | 7.70E-01                              | 6.15E-01                              | 1.19E+00                               | 14             | Ubiquinone and other terpenoid-quinone biosynthesis  |
| 1                          | 3.83E-01                             | 1.19E+00                              | 1.51E-01                              | 8.73E-01                               | 59             | Sphingolipid metabolism                              |
| 1                          | 1.96E-01                             | 8.85E-01                              | 6.72E-01                              | 1.17E+00                               | 70             | Vitamin B6 metabolism                                |
| 1                          | 1.77E-01                             | 3.31E-01                              | 2.01E-01                              | 1.48E+00                               | 80             | Sulfur metabolism                                    |
| 1                          | 1.48E-01                             | 5.69E-01                              | 4.94E-02                              | 1.08E+00                               | 48             | Glycosaminoglycan biosynthesis - chondroitin sulfate |
| 1                          | 1.48E-01                             | 5.69E-01                              | 4.94E-02                              | 1.08E+00                               | 50             | Glycosaminoglycan biosynthesis - heparan sulfate     |
